# Supplementary material
Source: publisher figshare collection journal article supplement (https://frontiersin.figshare.com/ndownloader/files/14341472)
Supplement: Supplementary file 1 [file 14341472]

## Sheet: spatial resolving power
This includes raw data of spatial resolving power.
We measured them on five animals per species or condition.
species/condition'	animal1	anima2	animal3	animal4	animal5	average	se
M.tarsata	0.583865	0.60293	0.621762	0.594589	0.604139	0.601457	0.00623823
M.midas	0.520833	0.569948	0.569948	0.569948	0.611582	0.568452	0.0143778
M.midas with medio-frontal region of the eye only exposed	0.572917	0.520833	0.520833	0.572917	0.46875	0.53125	0.0194878

## Sheet: spatial_resolving_p_diameter
This includes raw data of spatial resolving power and average facet diameter of each individual.
species/condition'	spatial resolving power	facet_diameter
M.tarsata	0.583865	0.023
M.tarsata	0.60293	0.022
M.tarsata	0.621762	0.023
M.tarsata	0.594589	0.023
M.tarsata	0.604139	0.021
M.midas	0.520833	0.0332667
M.midas	0.569948	0.0304667
M.midas	0.569948	0.0318
M.midas	0.569948	0.0314333
M.midas	0.611582	0.0311333
M.midas with medio-frontal region of the eye only exposed	0.572917	0.0296333
M.midas with medio-frontal region of the eye only exposed	0.520833	0.0321667
M.midas with medio-frontal region of the eye only exposed	0.520833	0.0281667
M.midas with medio-frontal region of the eye only exposed	0.572917	0.0281
M.midas with medio-frontal region of the eye only exposed	0.46875	0.0276333

## Sheet: individual_facet_diameters
individual facet diameter	species	condition	animal ID		This includes data of diameters of 30 facets per individual for all species/ condition.
0.023	1	1	1		This data is used to check the varience of facet diameter within species or within an individual.
0.019	1	1	1		The results of statistical analysis are shown below
0.024	1	1	1
0.027	1	1	1
0.023	1	1	1		species
0.018	1	1	1		1= M. tarsata
0.024	1	1	1		2= M.midas
0.025	1	1	1
0.026	1	1	1
0.02	1	1	1		condition
0.025	1	1	1		1= M. tarsata
0.027	1	1	1		2= M.midas
0.025	1	1	1		3= M.midas with medio-frontal region of the eye only exposed
0.02	1	1	1
0.02	1	1	1
0.021	1	1	1
0.021	1	1	1
0.023	1	1	1
0.022	1	1	1
0.022	1	1	1
0.02	1	1	1
0.023	1	1	1
0.028	1	1	1
0.023	1	1	1
0.021	1	1	1
0.024	1	1	1
0.025	1	1	1
0.019	1	1	1
0.024	1	1	1
0.022	1	1	1
0.02	1	1	2
0.025	1	1	2
0.021	1	1	2
0.02	1	1	2
0.023	1	1	2
0.023	1	1	2
0.022	1	1	2
0.024	1	1	2
0.022	1	1	2
0.023	1	1	2
0.02	1	1	2
0.02	1	1	2
0.024	1	1	2
0.024	1	1	2
0.023	1	1	2
0.02	1	1	2
0.022	1	1	2
0.023	1	1	2
0.022	1	1	2
0.021	1	1	2
0.023	1	1	2
0.02	1	1	2
0.025	1	1	2
0.022	1	1	2
0.023	1	1	2
0.021	1	1	2
0.022	1	1	2
0.022	1	1	2
0.022	1	1	2
0.025	1	1	2
0.024	1	1	3
0.023	1	1	3
0.024	1	1	3
0.025	1	1	3
0.022	1	1	3
0.025	1	1	3
0.024	1	1	3
0.023	1	1	3
0.025	1	1	3
0.023	1	1	3
0.025	1	1	3
0.024	1	1	3
0.024	1	1	3
0.025	1	1	3
0.024	1	1	3
0.021	1	1	3
0.023	1	1	3
0.02	1	1	3
0.023	1	1	3
0.024	1	1	3
0.027	1	1	3
0.022	1	1	3
0.023	1	1	3
0.024	1	1	3
0.023	1	1	3
0.026	1	1	3
0.023	1	1	3
0.025	1	1	3
0.023	1	1	3
0.025	1	1	3
0.025	1	1	4
0.022	1	1	4
0.024	1	1	4
0.024	1	1	4
0.02	1	1	4
0.025	1	1	4
0.023	1	1	4
0.023	1	1	4
0.025	1	1	4
0.023	1	1	4
0.025	1	1	4
0.023	1	1	4
0.025	1	1	4
0.023	1	1	4
0.023	1	1	4
0.027	1	1	4
0.023	1	1	4
0.018	1	1	4
0.023	1	1	4
0.024	1	1	4
0.025	1	1	4
0.02	1	1	4
0.021	1	1	4
0.023	1	1	4
0.023	1	1	4
0.023	1	1	4
0.023	1	1	4
0.021	1	1	4
0.021	1	1	4
0.025	1	1	4
0.021	1	1	5
0.021	1	1	5
0.023	1	1	5
0.019	1	1	5
0.021	1	1	5
0.021	1	1	5
0.018	1	1	5
0.02	1	1	5
0.021	1	1	5
0.023	1	1	5
0.019	1	1	5
0.018	1	1	5
0.017	1	1	5
0.019	1	1	5
0.022	1	1	5
0.022	1	1	5
0.02	1	1	5
0.02	1	1	5
0.021	1	1	5
0.023	1	1	5
0.022	1	1	5
0.021	1	1	5
0.023	1	1	5
0.022	1	1	5
0.021	1	1	5
0.02	1	1	5
0.023	1	1	5
0.021	1	1	5
0.021	1	1	5
0.022	1	1	5
0.027	2	2	6
0.029	2	2	6
0.03	2	2	6
0.035	2	2	6
0.037	2	2	6
0.035	2	2	6
0.034	2	2	6
0.033	2	2	6
0.035	2	2	6
0.034	2	2	6
0.034	2	2	6
0.037	2	2	6
0.033	2	2	6
0.035	2	2	6
0.033	2	2	6
0.032	2	2	6
0.032	2	2	6
0.033	2	2	6
0.031	2	2	6
0.032	2	2	6
0.035	2	2	6
0.034	2	2	6
0.032	2	2	6
0.032	2	2	6
0.031	2	2	6
0.035	2	2	6
0.034	2	2	6
0.034	2	2	6
0.036	2	2	6
0.034	2	2	6
0.029	2	2	7
0.026	2	2	7
0.027	2	2	7
0.028	2	2	7
0.03	2	2	7
0.027	2	2	7
0.03	2	2	7
0.033	2	2	7
0.032	2	2	7
0.028	2	2	7
0.027	2	2	7
0.028	2	2	7
0.027	2	2	7
0.032	2	2	7
0.029	2	2	7
0.031	2	2	7
0.032	2	2	7
0.031	2	2	7
0.031	2	2	7
0.03	2	2	7
0.035	2	2	7
0.032	2	2	7
0.03	2	2	7
0.034	2	2	7
0.033	2	2	7
0.034	2	2	7
0.031	2	2	7
0.033	2	2	7
0.031	2	2	7
0.033	2	2	7
0.028	2	2	8
0.03	2	2	8
0.033	2	2	8
0.035	2	2	8
0.033	2	2	8
0.032	2	2	8
0.032	2	2	8
0.03	2	2	8
0.035	2	2	8
0.032	2	2	8
0.032	2	2	8
0.032	2	2	8
0.032	2	2	8
0.034	2	2	8
0.034	2	2	8
0.032	2	2	8
0.029	2	2	8
0.03	2	2	8
0.031	2	2	8
0.029	2	2	8
0.031	2	2	8
0.03	2	2	8
0.03	2	2	8
0.032	2	2	8
0.035	2	2	8
0.032	2	2	8
0.033	2	2	8
0.028	2	2	8
0.034	2	2	8
0.034	2	2	8
0.029	2	2	9
0.03	2	2	9
0.033	2	2	9
0.031	2	2	9
0.03	2	2	9
0.03	2	2	9
0.031	2	2	9
0.033	2	2	9
0.031	2	2	9
0.03	2	2	9
0.032	2	2	9
0.03	2	2	9
0.032	2	2	9
0.033	2	2	9
0.033	2	2	9
0.029	2	2	9
0.029	2	2	9
0.031	2	2	9
0.028	2	2	9
0.033	2	2	9
0.032	2	2	9
0.03	2	2	9
0.035	2	2	9
0.031	2	2	9
0.035	2	2	9
0.033	2	2	9
0.034	2	2	9
0.033	2	2	9
0.032	2	2	9
0.03	2	2	9
0.026	2	2	10
0.031	2	2	10
0.035	2	2	10
0.03	2	2	10
0.033	2	2	10
0.034	2	2	10
0.032	2	2	10
0.029	2	2	10
0.029	2	2	10
0.032	2	2	10
0.029	2	2	10
0.031	2	2	10
0.032	2	2	10
0.035	2	2	10
0.031	2	2	10
0.031	2	2	10
0.033	2	2	10
0.031	2	2	10
0.036	2	2	10
0.03	2	2	10
0.029	2	2	10
0.031	2	2	10
0.032	2	2	10
0.03	2	2	10
0.032	2	2	10
0.034	2	2	10
0.03	2	2	10
0.03	2	2	10
0.03	2	2	10
0.026	2	2	10
0.032	2	3	11
0.032	2	3	11
0.027	2	3	11
0.03	2	3	11
0.029	2	3	11
0.029	2	3	11
0.028	2	3	11
0.028	2	3	11
0.028	2	3	11
0.03	2	3	11
0.033	2	3	11
0.035	2	3	11
0.027	2	3	11
0.028	2	3	11
0.032	2	3	11
0.027	2	3	11
0.027	2	3	11
0.025	2	3	11
0.032	2	3	11
0.036	2	3	11
0.033	2	3	11
0.034	2	3	11
0.025	2	3	11
0.033	2	3	11
0.029	2	3	11
0.025	2	3	11
0.029	2	3	11
0.026	2	3	11
0.029	2	3	11
0.031	2	3	11
0.029	2	3	12
0.035	2	3	12
0.037	2	3	12
0.031	2	3	12
0.035	2	3	12
0.036	2	3	12
0.037	2	3	12
0.033	2	3	12
0.032	2	3	12
0.036	2	3	12
0.034	2	3	12
0.034	2	3	12
0.032	2	3	12
0.03	2	3	12
0.03	2	3	12
0.032	2	3	12
0.035	2	3	12
0.031	2	3	12
0.031	2	3	12
0.031	2	3	12
0.029	2	3	12
0.031	2	3	12
0.033	2	3	12
0.031	2	3	12
0.029	2	3	12
0.03	2	3	12
0.03	2	3	12
0.028	2	3	12
0.032	2	3	12
0.031	2	3	12
0.029	2	3	13
0.027	2	3	13
0.026	2	3	13
0.027	2	3	13
0.026	2	3	13
0.029	2	3	13
0.028	2	3	13
0.031	2	3	13
0.024	2	3	13
0.028	2	3	13
0.024	2	3	13
0.03	2	3	13
0.03	2	3	13
0.03	2	3	13
0.028	2	3	13
0.028	2	3	13
0.025	2	3	13
0.023	2	3	13
0.026	2	3	13
0.025	2	3	13
0.027	2	3	13
0.029	2	3	13
0.032	2	3	13
0.029	2	3	13
0.032	2	3	13
0.03	2	3	13
0.029	2	3	13
0.031	2	3	13
0.029	2	3	13
0.033	2	3	13
0.029	2	3	14
0.029	2	3	14
0.029	2	3	14
0.032	2	3	14
0.031	2	3	14
0.028	2	3	14
0.032	2	3	14
0.027	2	3	14
0.029	2	3	14
0.027	2	3	14
0.028	2	3	14
0.029	2	3	14
0.027	2	3	14
0.025	2	3	14
0.028	2	3	14
0.027	2	3	14
0.025	2	3	14
0.028	2	3	14
0.026	2	3	14
0.028	2	3	14
0.027	2	3	14
0.026	2	3	14
0.03	2	3	14
0.028	2	3	14
0.028	2	3	14
0.03	2	3	14
0.03	2	3	14
0.028	2	3	14
0.025	2	3	14
0.027	2	3	14
0.028	2	3	15
0.029	2	3	15
0.029	2	3	15
0.028	2	3	15
0.028	2	3	15
0.027	2	3	15
0.028	2	3	15
0.027	2	3	15
0.03	2	3	15
0.03	2	3	15
0.03	2	3	15
0.03	2	3	15
0.032	2	3	15
0.03	2	3	15
0.027	2	3	15
0.027	2	3	15
0.027	2	3	15
0.029	2	3	15
0.028	2	3	15
0.025	2	3	15
0.024	2	3	15
0.029	2	3	15
0.027	2	3	15
0.024	2	3	15
0.027	2	3	15
0.022	2	3	15
0.028	2	3	15
0.025	2	3	15
0.024	2	3	15
0.03	2	3	15

## Sheet: contrast_ss_individuals
This includes raw data of contrast sensitivity at each spatial frequency.
We measured five animals per species or condition.
All values highlighted with blue are log (base10) transformed.
There are missing values at some spatial frequencies because the signals did not reach to the noise threshold in some individuals.
'species'	values are log(base10) transformed									original values (non-log transformed) used in main text
M.tarsata		contrast sensitivity
	spatial frequencies	animal1	anima2	animal3	animal4	animal5	average_contrast_sens	se_contrast_sensitivity		spatial frequencies	average_contrast_ss	Michelson’s contrasts (%)
	-1.28556	1.16584	1.18686	1.35631	1.06583	1.05592	1.16615	0.0542233		0.0518135	14.6606	6.821
	-0.984527	1.10698	1.22057	1.52288	1.08718	1.01611	1.19074	0.0892866		0.103627	15.5148	6.44548
	-0.808436	0.825345	0.850206	1.02103	0.567667	0.530968	0.759043	0.0921918		0.15544	5.74174	17.4163
	-0.683497	0.579411	0.598573	1.32803	0.531158	0.544916	0.716418	0.153373		0.207254	5.20497	19.2124
	-0.586587	0.491905	0.482143	0.60206	0.294888	0.31952	0.438103	0.057571		0.259067	2.74223	36.4667
	-0.507406	0.279605	0.331857	1.17545	0.24505	0.261224	0.458638	0.179797		0.310881	2.875	34.7826
	-0.440459	0.262473	0.265914	0.30103	0.170492	0.244159	0.248814	0.021635		0.362694	1.77343	56.388
	-0.382467	0.201572	0.217151	0.280826	0.0945555	0.238249	0.206471	0.0309852		0.414508	1.60868	62.1626
	-0.331315	0.149756	0.232005	0.285291	0.101481	0.10062	0.173831	0.0367298		0.466321	1.49221	67.0146
	-0.285557	0.280496	0.206803	0.220494	0.0940622	0.0997952	0.18033	0.0362458		0.518135	1.51471	66.0191
	-0.244165	0.0222764	0.202274	0.231291	0.0222764	0.0222764	0.100079	0.0478644		0.569948	1.25915	79.4184
	-0.206376									0.621762
	-0.171614									0.673575
	-0.139429									0.725389
M.midas		contrast sensitivity
	spatial frequencies	animal1	anima2	animal3	animal4	animal5	average_contrast_sens	se_contrast_sensitivity		spatial frequencies	average_contrast_ss	Michelson’s contrasts (%)
	-1.28556	1.51304	1.04508	1.12065	1.30839	1.64263	1.32596	0.113276		0.0518135	21.1816	4.72108
	-0.984527	0.975676	0.762306	0.879067	1.16482	1.34296	1.02497	0.103292		0.103627	10.5917	9.44135
	-0.808436	0.395748	0.714158	0.65767	0.848873	1.10119	0.743527	0.115802		0.15544	5.54022	18.0498
	-0.683497	0.674573	0.554222	0.460167	0.731664	0.828138	0.649753	0.0648905		0.207254	4.46429	22.4
	-0.586587	0.235981	0.385867	0.430352	0.583996	0.796683	0.486576	0.0953305		0.259067	3.06603	32.6155
	-0.507406	0.27226	0.414539	0.515339	0.512521	0.729624	0.488857	0.074722		0.310881	3.08217	32.4447
	-0.440459	0.368977	0.216069	0.266018	0.512444	0.594687	0.391639	0.071743		0.362694	2.46399	40.5845
	-0.382467	0.18219	0.26746	0.239546	0.289452	0.646809	0.325091	0.0824113		0.414508	2.11393	47.3052
	-0.331315	0.255161	0.184478	0.207098	0.312328	0.436505	0.279114	0.0450506		0.466321	1.90158	52.5879
	-0.285557	0.0384236	0.104889	0.171077	0.20963	0.255608	0.155925	0.0383808		0.518135	1.43194	69.8352
	-0.244165	0.0222764	0.0903659	0.0375705	0.171156	0.278842	0.120042	0.0474712		0.569948	1.31838	75.8504
	-0.206376	0.0504219	0.0222764				0.0363492	0.0140728		0.621762	1.0873	91.971
	-0.171614									0.673575
	-0.139429		0.0222764				0.0222764			0.725389	1.05263	95
M.midas with medio-frontal region of the eye only exposed
		contrast sensitivity
	spatial frequencies	animal1	anima2	animal3	animal4	animal5	average_contrast_sens	se_contrast_sensitivity		spatial frequencies	average_contrast_ss	Michelson’s contrasts (%)
	-1.28556	1.50717	1.32489	1.51574	1.16198	1.14646	1.33125	0.0799456		0.0518135	21.441	4.66396
	-0.984527	1.20504	0.890917	1.22185	0.90309	1.05202	1.05458	0.070837		0.103627	11.3392	8.81897
	-0.808436	0.896825	0.733719	1.17555	1.22185	0.596619	0.924912	0.121678		0.15544	8.41224	11.8874
	-0.683497	0.90309	0.537343	0.90309	0.458496	0.92421	0.745246	0.10181		0.207254	5.56219	17.9785
	-0.586587	0.867228	0.743103	0.60206	0.682366	0.502082	0.679368	0.0619554		0.259067	4.77934	20.9234
	-0.507406	0.83875	0.412301	0.502528	0.445816	0.329133	0.505706	0.0878685		0.310881	3.2041	31.21
	-0.440459	0.479504	0.263233	0.559124	0.573105	0.30103	0.435199	0.0647735		0.362694	2.72395	36.7114
	-0.382467	0.470419	0.260667	0.296267	0.366152	0.132623	0.305226	0.0560617		0.414508	2.01942	49.5193
	-0.331315	0.280661	0.215661	0.247046	0.235426	0.0595018	0.207659	0.0385138		0.466321	1.61309	61.9927
	-0.285557	0.30103	0.1742	0.0222764	0.216436		0.178486	0.0583645		0.518135	1.50829	66.3001
	-0.244165	0.30103		0.0222764	0.187924		0.17041	0.0809443		0.569948	1.48051	67.5445
	-0.206376									0.621762
	-0.171614									0.673575
	-0.139429									0.725389

## Sheet: for_stats_contrast_midas_tarsat
'species'	animal ID	spatial frequency	contrast sensitivity	facet diameter		This includes raw data of contrast sensitivity at each spatial frequency with facet diameter for each animal in M. tarsata and M.mida.
1	1	-1.28556	1.16584	0.023		All values of spatial frequencies and contrast sensitivity are log (base10) transformed.
1	1	-0.984527	1.10698	0.023		This data is used in a mixed-effects model to regress log-transformed contrast sensitivity data over facet diameter, with spatial frequency being a fixed effect.
1	1	-0.808436	0.825345	0.023
1	1	-0.683497	0.579411	0.023
1	1	-0.586587	0.491905	0.023		species'
1	1	-0.507406	0.279605	0.023		1=M.tarsata
1	1	-0.440459	0.262473	0.023		2=M.midas
1	1	-0.382467	0.201572	0.023
1	1	-0.331315	0.149756	0.023
1	1	-0.285557	0.280496	0.023
1	1	-0.244165	0.0222764	0.023
1	2	-1.28556	1.18686	0.022
1	2	-0.984527	1.22057	0.022
1	2	-0.808436	0.850206	0.022
1	2	-0.683497	0.598573	0.022
1	2	-0.586587	0.482143	0.022
1	2	-0.507406	0.331857	0.022
1	2	-0.440459	0.265914	0.022
1	2	-0.382467	0.217151	0.022
1	2	-0.331315	0.232005	0.022
1	2	-0.285557	0.206803	0.022
1	2	-0.244165	0.202274	0.022
1	3	-1.28556	1.35631	0.023
1	3	-0.984527	1.52288	0.023
1	3	-0.808436	1.02103	0.023
1	3	-0.683497	1.32803	0.023
1	3	-0.586587	0.60206	0.023
1	3	-0.507406	1.17545	0.023
1	3	-0.440459	0.30103	0.023
1	3	-0.382467	0.280826	0.023
1	3	-0.331315	0.285291	0.023
1	3	-0.285557	0.220494	0.023
1	3	-0.244165	0.231291	0.023
1	4	-1.28556	1.06583	0.023
1	4	-0.984527	1.08718	0.023
1	4	-0.808436	0.567667	0.023
1	4	-0.683497	0.531158	0.023
1	4	-0.586587	0.294888	0.023
1	4	-0.507406	0.24505	0.023
1	4	-0.440459	0.170492	0.023
1	4	-0.382467	0.0945555	0.023
1	4	-0.331315	0.101481	0.023
1	4	-0.285557	0.0940622	0.023
1	4	-0.244165	0.0222764	0.023
1	5	-1.28556	1.05592	0.021
1	5	-0.984527	1.01611	0.021
1	5	-0.808436	0.530968	0.021
1	5	-0.683497	0.544916	0.021
1	5	-0.586587	0.31952	0.021
1	5	-0.507406	0.261224	0.021
1	5	-0.440459	0.244159	0.021
1	5	-0.382467	0.238249	0.021
1	5	-0.331315	0.10062	0.021
1	5	-0.285557	0.0997952	0.021
1	5	-0.244165	0.0222764	0.021
2	6	-1.28556	1.51304	0.0332667
2	6	-0.984527	0.975676	0.0332667
2	6	-0.808436	0.395748	0.0332667
2	6	-0.683497	0.674573	0.0332667
2	6	-0.586587	0.235981	0.0332667
2	6	-0.507406	0.27226	0.0332667
2	6	-0.440459	0.368977	0.0332667
2	6	-0.382467	0.18219	0.0332667
2	6	-0.331315	0.255161	0.0332667
2	6	-0.285557	0.0384236	0.0332667
2	6	-0.244165	0.0222764	0.0332667
2	6	-0.206376	0.0504219	0.0332667
2	7	-1.28556	1.04508	0.0304667
2	7	-0.984527	0.762306	0.0304667
2	7	-0.808436	0.714158	0.0304667
2	7	-0.683497	0.554222	0.0304667
2	7	-0.586587	0.385867	0.0304667
2	7	-0.507406	0.414539	0.0304667
2	7	-0.440459	0.216069	0.0304667
2	7	-0.382467	0.26746	0.0304667
2	7	-0.331315	0.184478	0.0304667
2	7	-0.285557	0.104889	0.0304667
2	7	-0.244165	0.0903659	0.0304667
2	7	-0.206376	0.0222764	0.0304667
2	7	-0.139429	0.0222764	0.0304667
2	8	-1.28556	1.12065	0.0318
2	8	-0.984527	0.879067	0.0318
2	8	-0.808436	0.65767	0.0318
2	8	-0.683497	0.460167	0.0318
2	8	-0.586587	0.430352	0.0318
2	8	-0.507406	0.515339	0.0318
2	8	-0.440459	0.266018	0.0318
2	8	-0.382467	0.239546	0.0318
2	8	-0.331315	0.207098	0.0318
2	8	-0.285557	0.171077	0.0318
2	8	-0.244165	0.0375705	0.0318
2	9	-1.28556	1.30839	0.0314333
2	9	-0.984527	1.16482	0.0314333
2	9	-0.808436	0.848873	0.0314333
2	9	-0.683497	0.731664	0.0314333
2	9	-0.586587	0.583996	0.0314333
2	9	-0.507406	0.512521	0.0314333
2	9	-0.440459	0.512444	0.0314333
2	9	-0.382467	0.289452	0.0314333
2	9	-0.331315	0.312328	0.0314333
2	9	-0.285557	0.20963	0.0314333
2	9	-0.244165	0.171156	0.0314333
2	10	-1.28556	1.64263	0.0311333
2	10	-0.984527	1.34296	0.0311333
2	10	-0.808436	1.10119	0.0311333
2	10	-0.683497	0.828138	0.0311333
2	10	-0.586587	0.796683	0.0311333
2	10	-0.507406	0.729624	0.0311333
2	10	-0.440459	0.594687	0.0311333
2	10	-0.382467	0.646809	0.0311333
2	10	-0.331315	0.436505	0.0311333
2	10	-0.285557	0.255608	0.0311333
2	10	-0.244165	0.278842	0.0311333

## Sheet: for_stats_contrast_midas_medio
condition	animal ID	spatial frequency	contrast sensitivity	facet diameter		This includes raw data of contrast sensitivity at each spatial frequency with facet diameter for each animal in intact M.midas and M.midas with medio-frontal region of the eye only exposed.
1	1	-1.28556	1.51304	0.0332667		All values of spatial frequencies and contrast sensitivity are log (base10) transformed.
1	1	-0.984527	0.975676	0.0332667		This data is used in a mixed-effects model to regress log-transformed contrast sensitivity data over facet diameter, with spatial frequency being a fixed effect.
1	1	-0.808436	0.395748	0.0332667
1	1	-0.683497	0.674573	0.0332667
1	1	-0.586587	0.235981	0.0332667		condition
1	1	-0.507406	0.27226	0.0332667		1= M.midas
1	1	-0.440459	0.368977	0.0332667		2= M.midas with medio-frontal region of the eye only exposed
1	1	-0.382467	0.18219	0.0332667
1	1	-0.331315	0.255161	0.0332667
1	1	-0.285557	0.0384236	0.0332667
1	1	-0.244165	0.0222764	0.0332667
1	1	-0.206376	0.0504219	0.0332667
1	2	-1.28556	1.04508	0.0304667
1	2	-0.984527	0.762306	0.0304667
1	2	-0.808436	0.714158	0.0304667
1	2	-0.683497	0.554222	0.0304667
1	2	-0.586587	0.385867	0.0304667
1	2	-0.507406	0.414539	0.0304667
1	2	-0.440459	0.216069	0.0304667
1	2	-0.382467	0.26746	0.0304667
1	2	-0.331315	0.184478	0.0304667
1	2	-0.285557	0.104889	0.0304667
1	2	-0.244165	0.0903659	0.0304667
1	2	-0.206376	0.0222764	0.0304667
1	2	-0.139429	0.0222764	0.0304667
1	3	-1.28556	1.12065	0.0318
1	3	-0.984527	0.879067	0.0318
1	3	-0.808436	0.65767	0.0318
1	3	-0.683497	0.460167	0.0318
1	3	-0.586587	0.430352	0.0318
1	3	-0.507406	0.515339	0.0318
1	3	-0.440459	0.266018	0.0318
1	3	-0.382467	0.239546	0.0318
1	3	-0.331315	0.207098	0.0318
1	3	-0.285557	0.171077	0.0318
1	3	-0.244165	0.0375705	0.0318
1	4	-1.28556	1.30839	0.0314333
1	4	-0.984527	1.16482	0.0314333
1	4	-0.808436	0.848873	0.0314333
1	4	-0.683497	0.731664	0.0314333
1	4	-0.586587	0.583996	0.0314333
1	4	-0.507406	0.512521	0.0314333
1	4	-0.440459	0.512444	0.0314333
1	4	-0.382467	0.289452	0.0314333
1	4	-0.331315	0.312328	0.0314333
1	4	-0.285557	0.20963	0.0314333
1	4	-0.244165	0.171156	0.0314333
1	5	-1.28556	1.64263	0.0311333
1	5	-0.984527	1.34296	0.0311333
1	5	-0.808436	1.10119	0.0311333
1	5	-0.683497	0.828138	0.0311333
1	5	-0.586587	0.796683	0.0311333
1	5	-0.507406	0.729624	0.0311333
1	5	-0.440459	0.594687	0.0311333
1	5	-0.382467	0.646809	0.0311333
1	5	-0.331315	0.436505	0.0311333
1	5	-0.285557	0.255608	0.0311333
1	5	-0.244165	0.278842	0.0311333
2	6	-1.28556	1.50717	0.0296333
2	6	-0.984527	1.20504	0.0296333
2	6	-0.808436	0.896825	0.0296333
2	6	-0.683497	0.90309	0.0296333
2	6	-0.586587	0.867228	0.0296333
2	6	-0.507406	0.83875	0.0296333
2	6	-0.440459	0.479504	0.0296333
2	6	-0.382467	0.470419	0.0296333
2	6	-0.331315	0.280661	0.0296333
2	6	-0.285557	0.30103	0.0296333
2	6	-0.244165	0.30103	0.0296333
2	7	-1.28556	1.32489	0.0321667
2	7	-0.984527	0.890917	0.0321667
2	7	-0.808436	0.733719	0.0321667
2	7	-0.683497	0.537343	0.0321667
2	7	-0.586587	0.743103	0.0321667
2	7	-0.507406	0.412301	0.0321667
2	7	-0.440459	0.263233	0.0321667
2	7	-0.382467	0.260667	0.0321667
2	7	-0.331315	0.215661	0.0321667
2	7	-0.285557	0.1742	0.0321667
2	8	-1.28556	1.51574	0.0281667
2	8	-0.984527	1.22185	0.0281667
2	8	-0.808436	1.17555	0.0281667
2	8	-0.683497	0.90309	0.0281667
2	8	-0.586587	0.60206	0.0281667
2	8	-0.507406	0.502528	0.0281667
2	8	-0.440459	0.559124	0.0281667
2	8	-0.382467	0.296267	0.0281667
2	8	-0.331315	0.247046	0.0281667
2	8	-0.285557	0.0222764	0.0281667
2	8	-0.244165	0.0222764	0.0281667
2	9	-1.28556	1.16198	0.0281
2	9	-0.984527	0.90309	0.0281
2	9	-0.808436	1.22185	0.0281
2	9	-0.683497	0.458496	0.0281
2	9	-0.586587	0.682366	0.0281
2	9	-0.507406	0.445816	0.0281
2	9	-0.440459	0.573105	0.0281
2	9	-0.382467	0.366152	0.0281
2	9	-0.331315	0.235426	0.0281
2	9	-0.285557	0.216436	0.0281
2	9	-0.244165	0.187924	0.0281
2	10	-1.28556	1.14646	0.0276333
2	10	-0.984527	1.05202	0.0276333
2	10	-0.808436	0.596619	0.0276333
2	10	-0.683497	0.92421	0.0276333
2	10	-0.586587	0.502082	0.0276333
2	10	-0.507406	0.329133	0.0276333
2	10	-0.440459	0.30103	0.0276333
2	10	-0.382467	0.132623	0.0276333
2	10	-0.331315	0.0595018	0.0276333
